# Supplementary figures and images for: Importance of Interface in the Coarse-Grained Model of CNT /Epoxy Nanocomposites
Source: MDPI journal article supplement (doi:10.3390/nano9101479), 2019-10-17

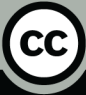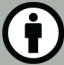

BY

Supplement: s1 [file s1]

**(a) All-atomistic model**

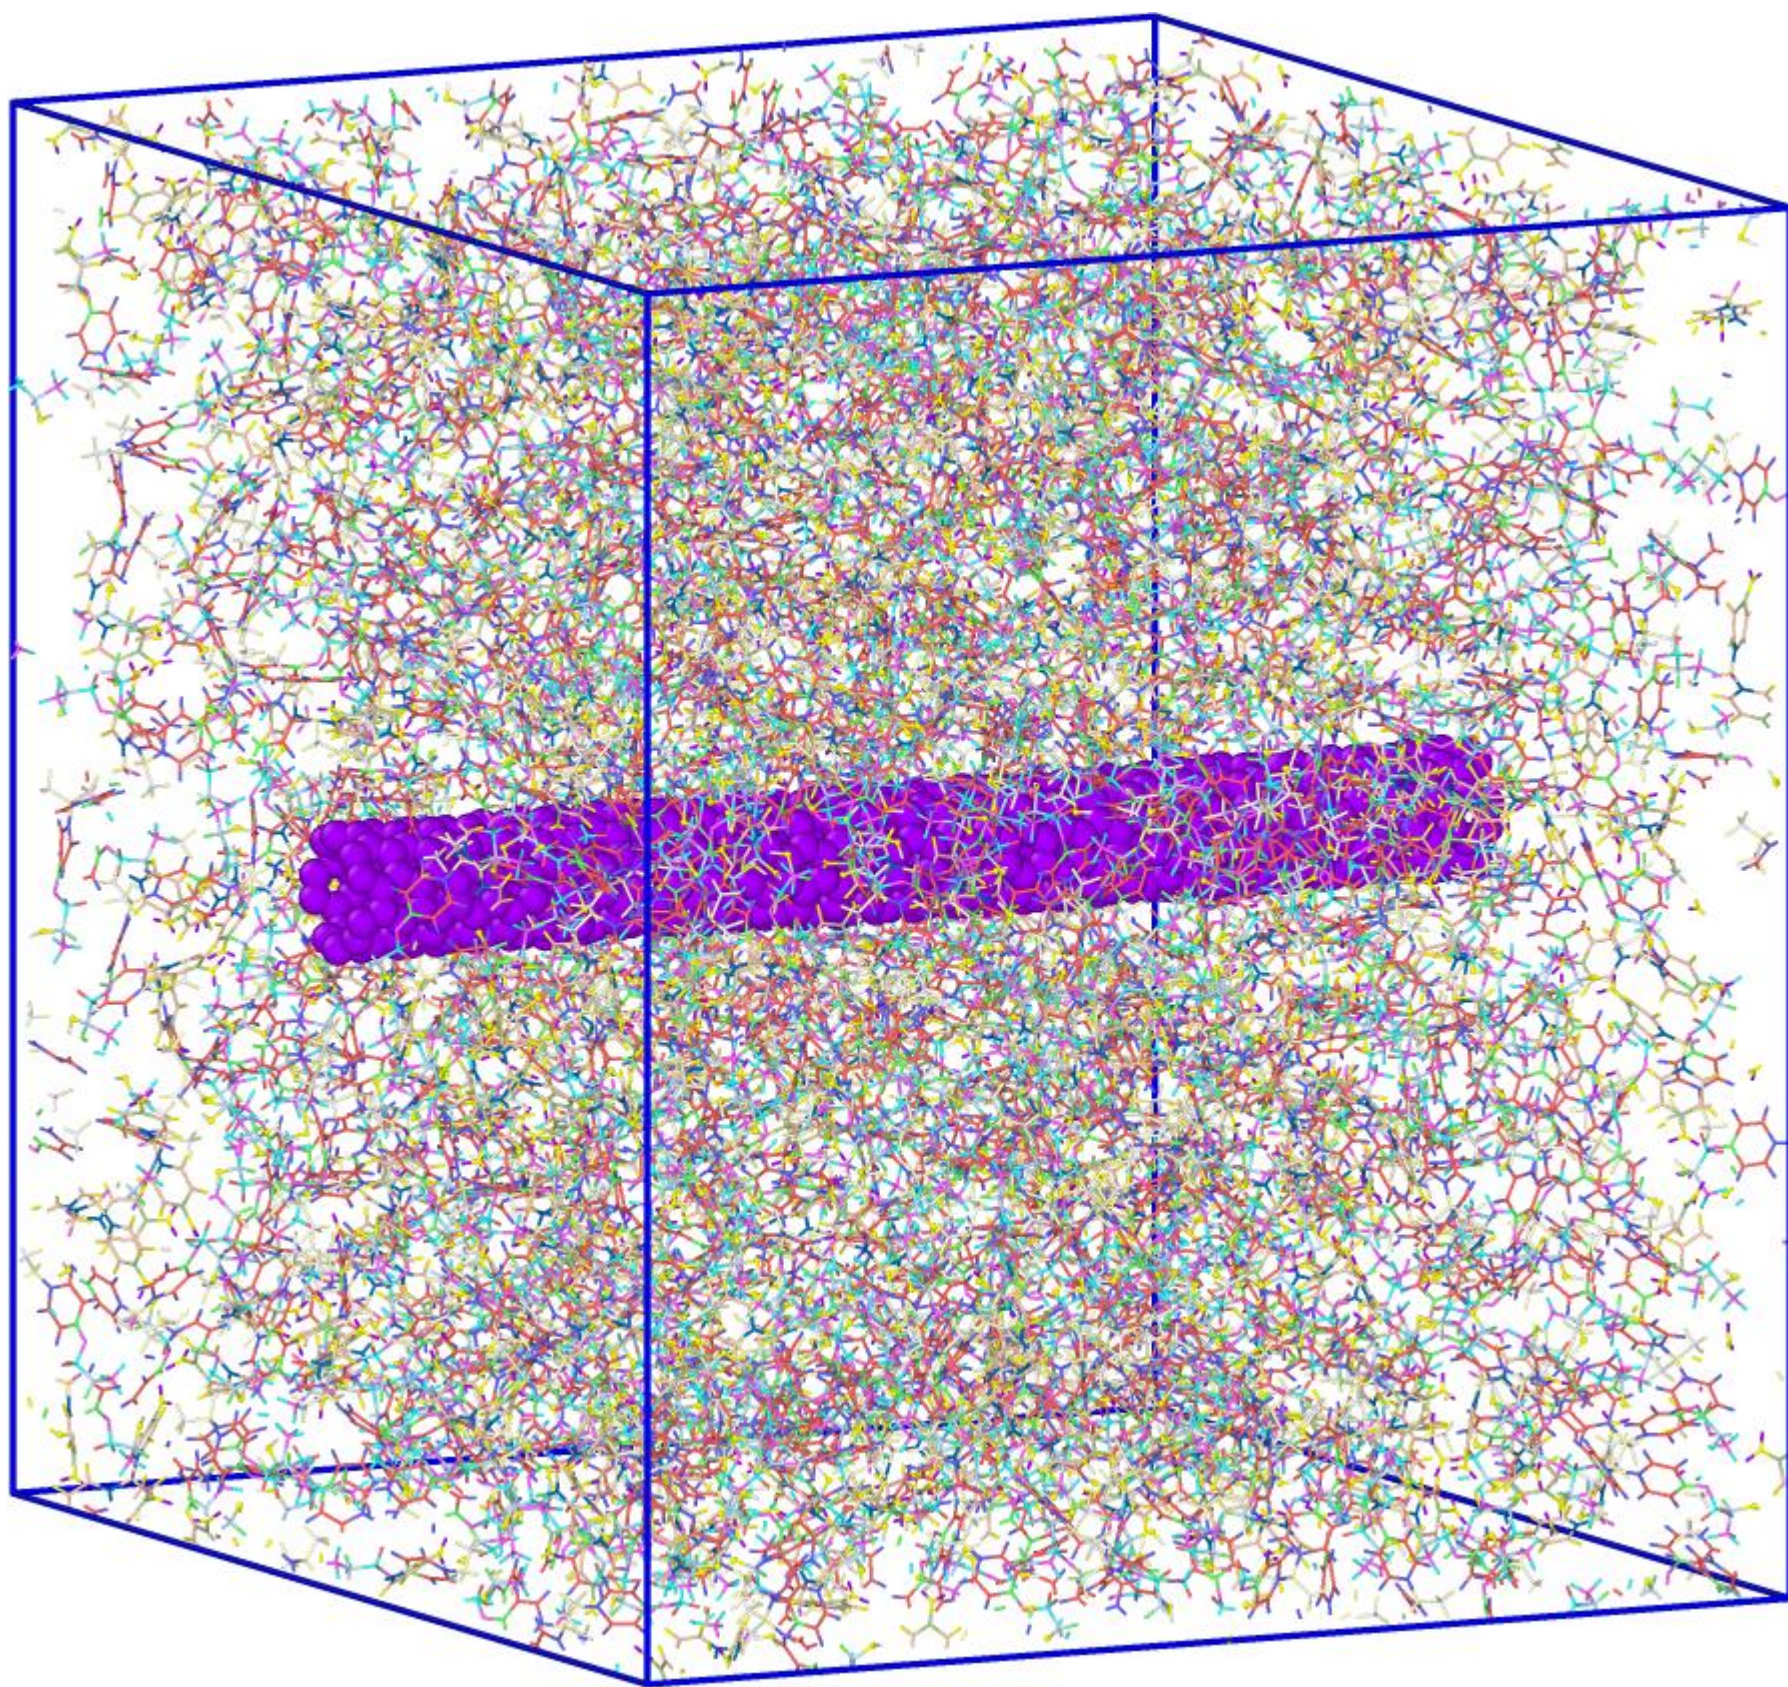

**(b) Coarse-grained model**

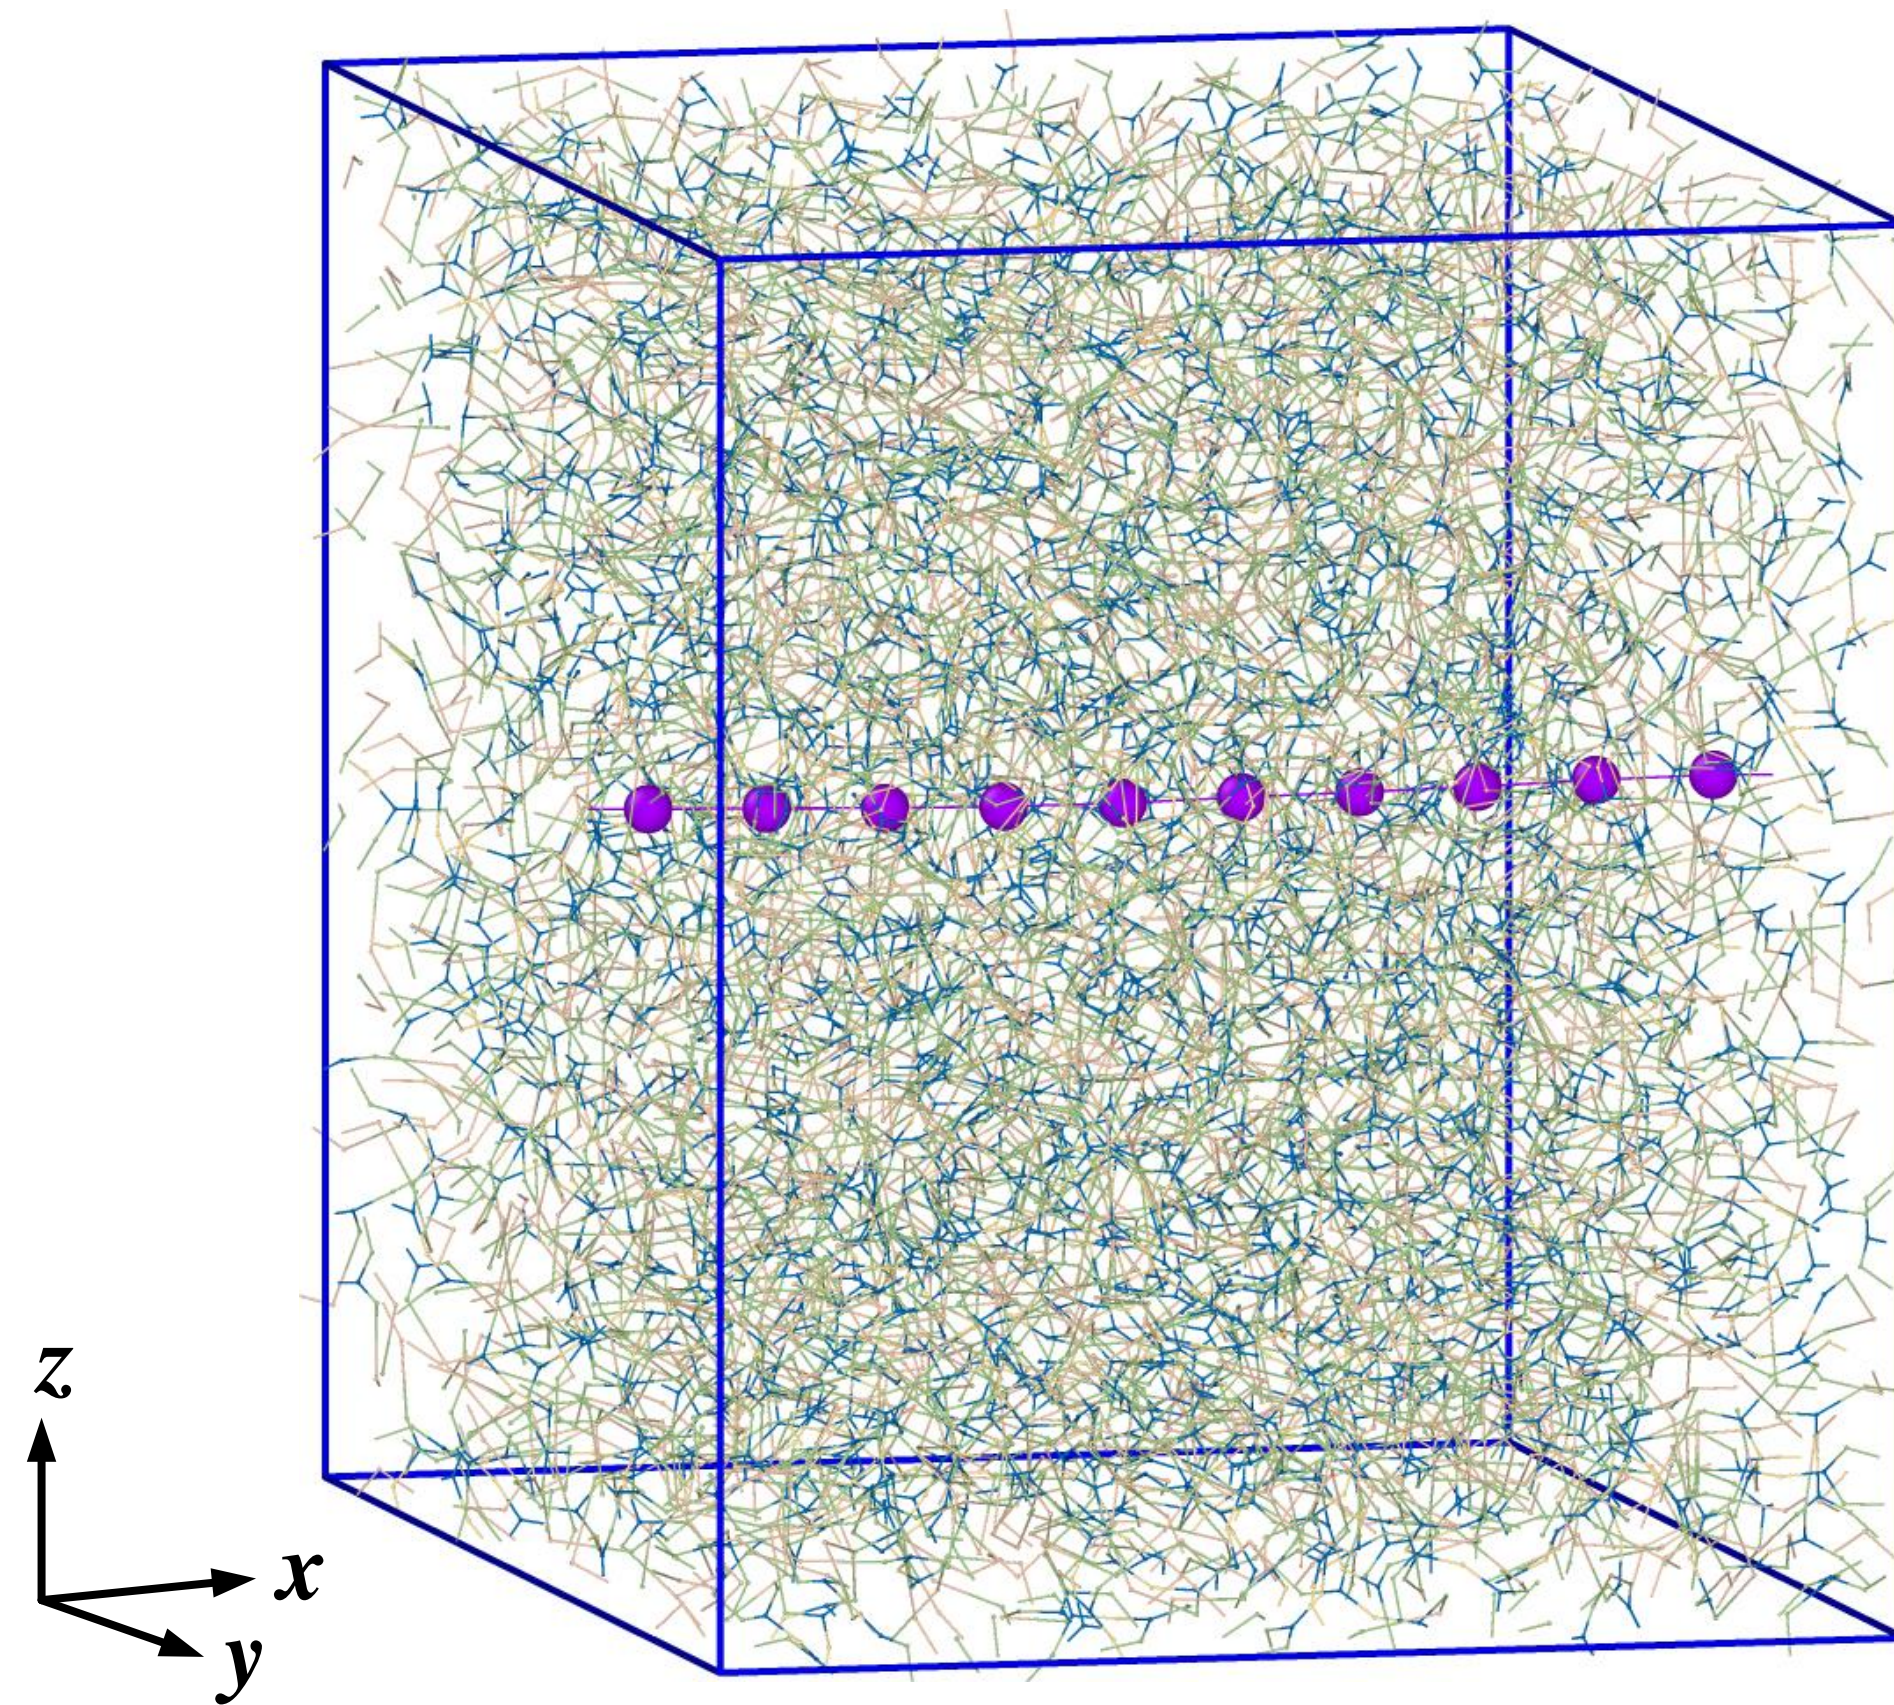

Supplement: s1 [file s1]

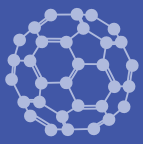

*nanomaterials*

Supplement: s1 [file s1]

**(a)**

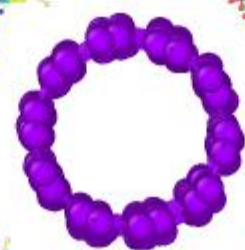

**(b)**

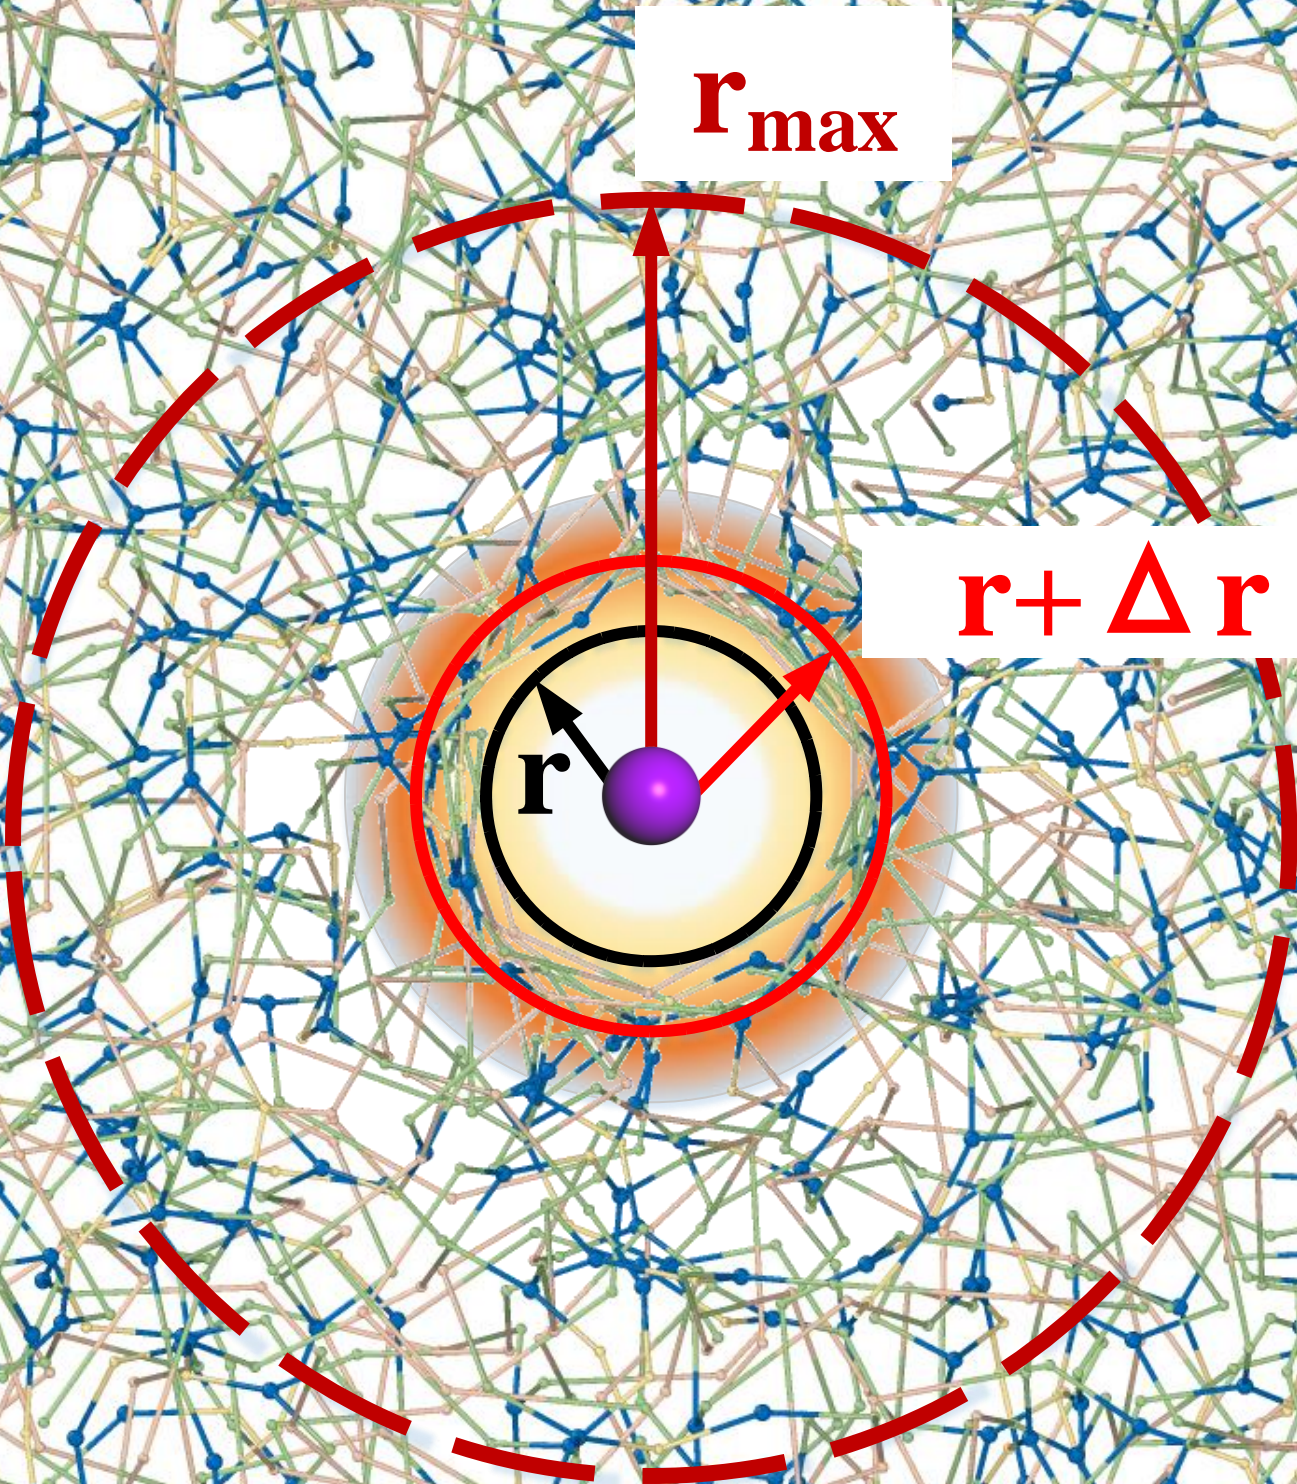

Supplement: s1 [file s1]

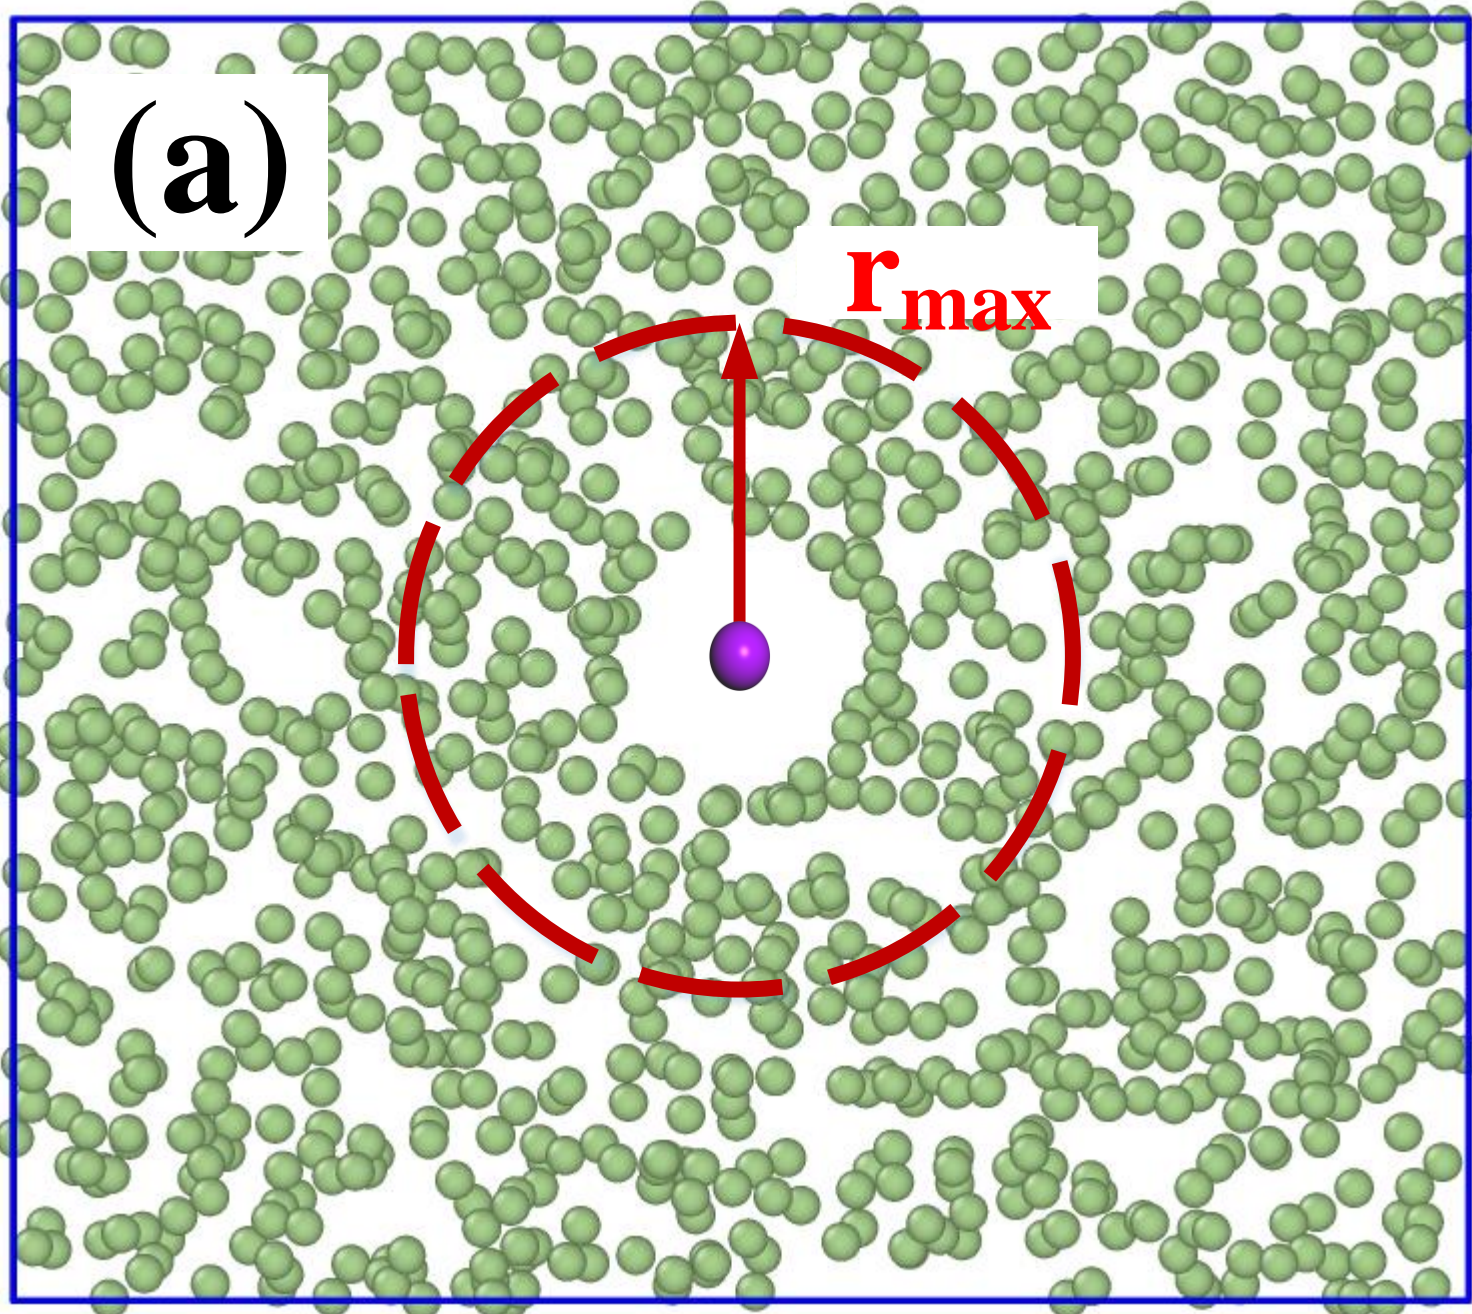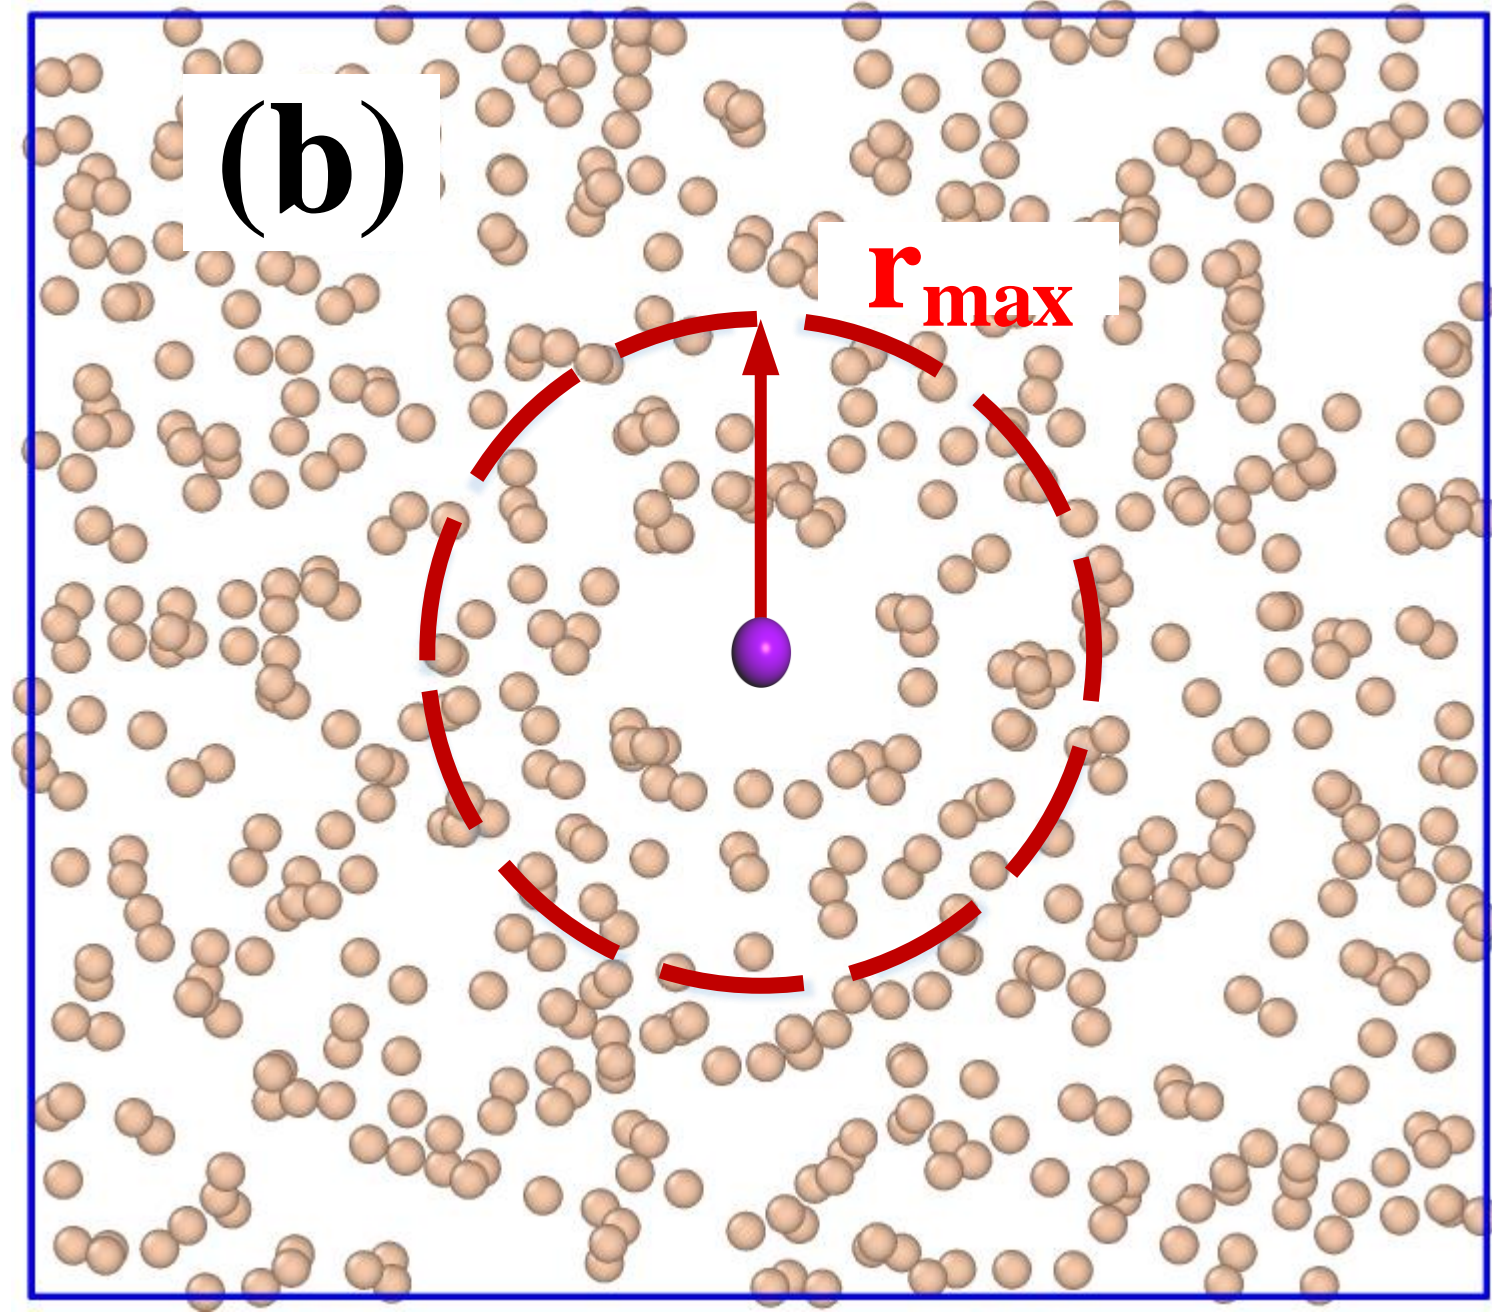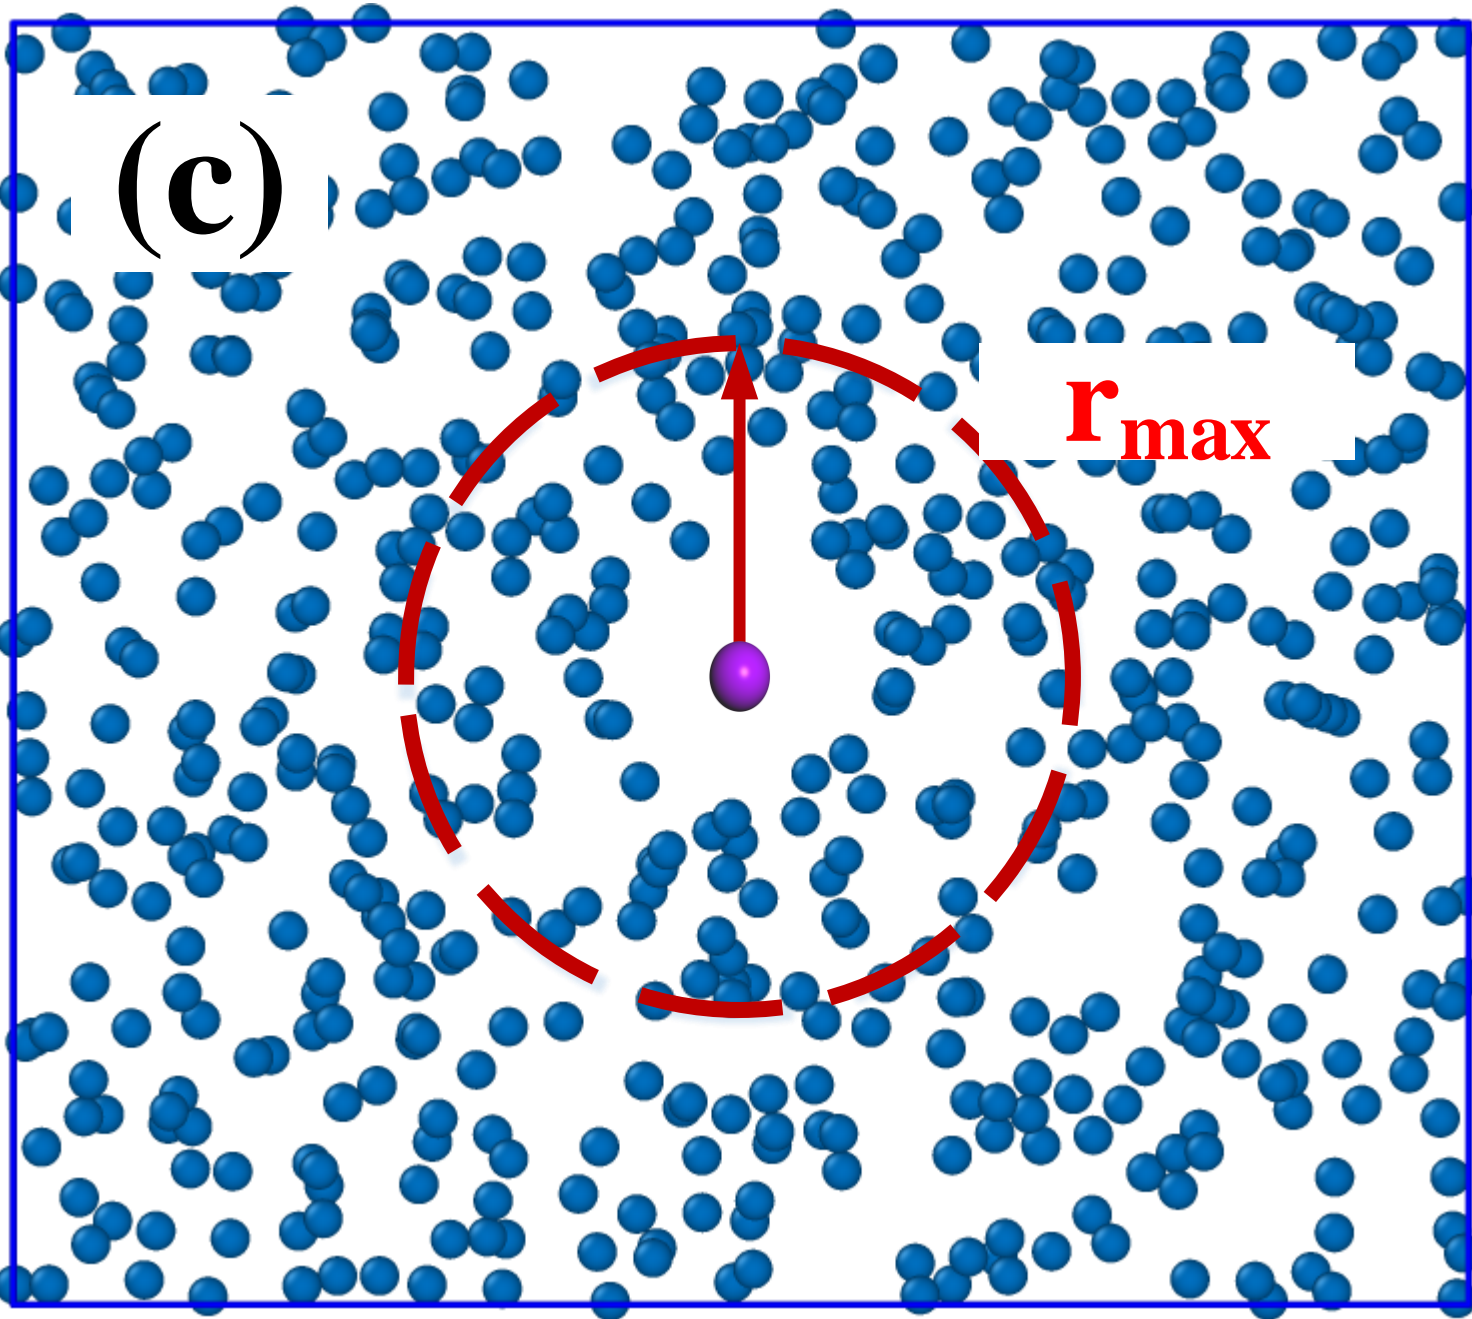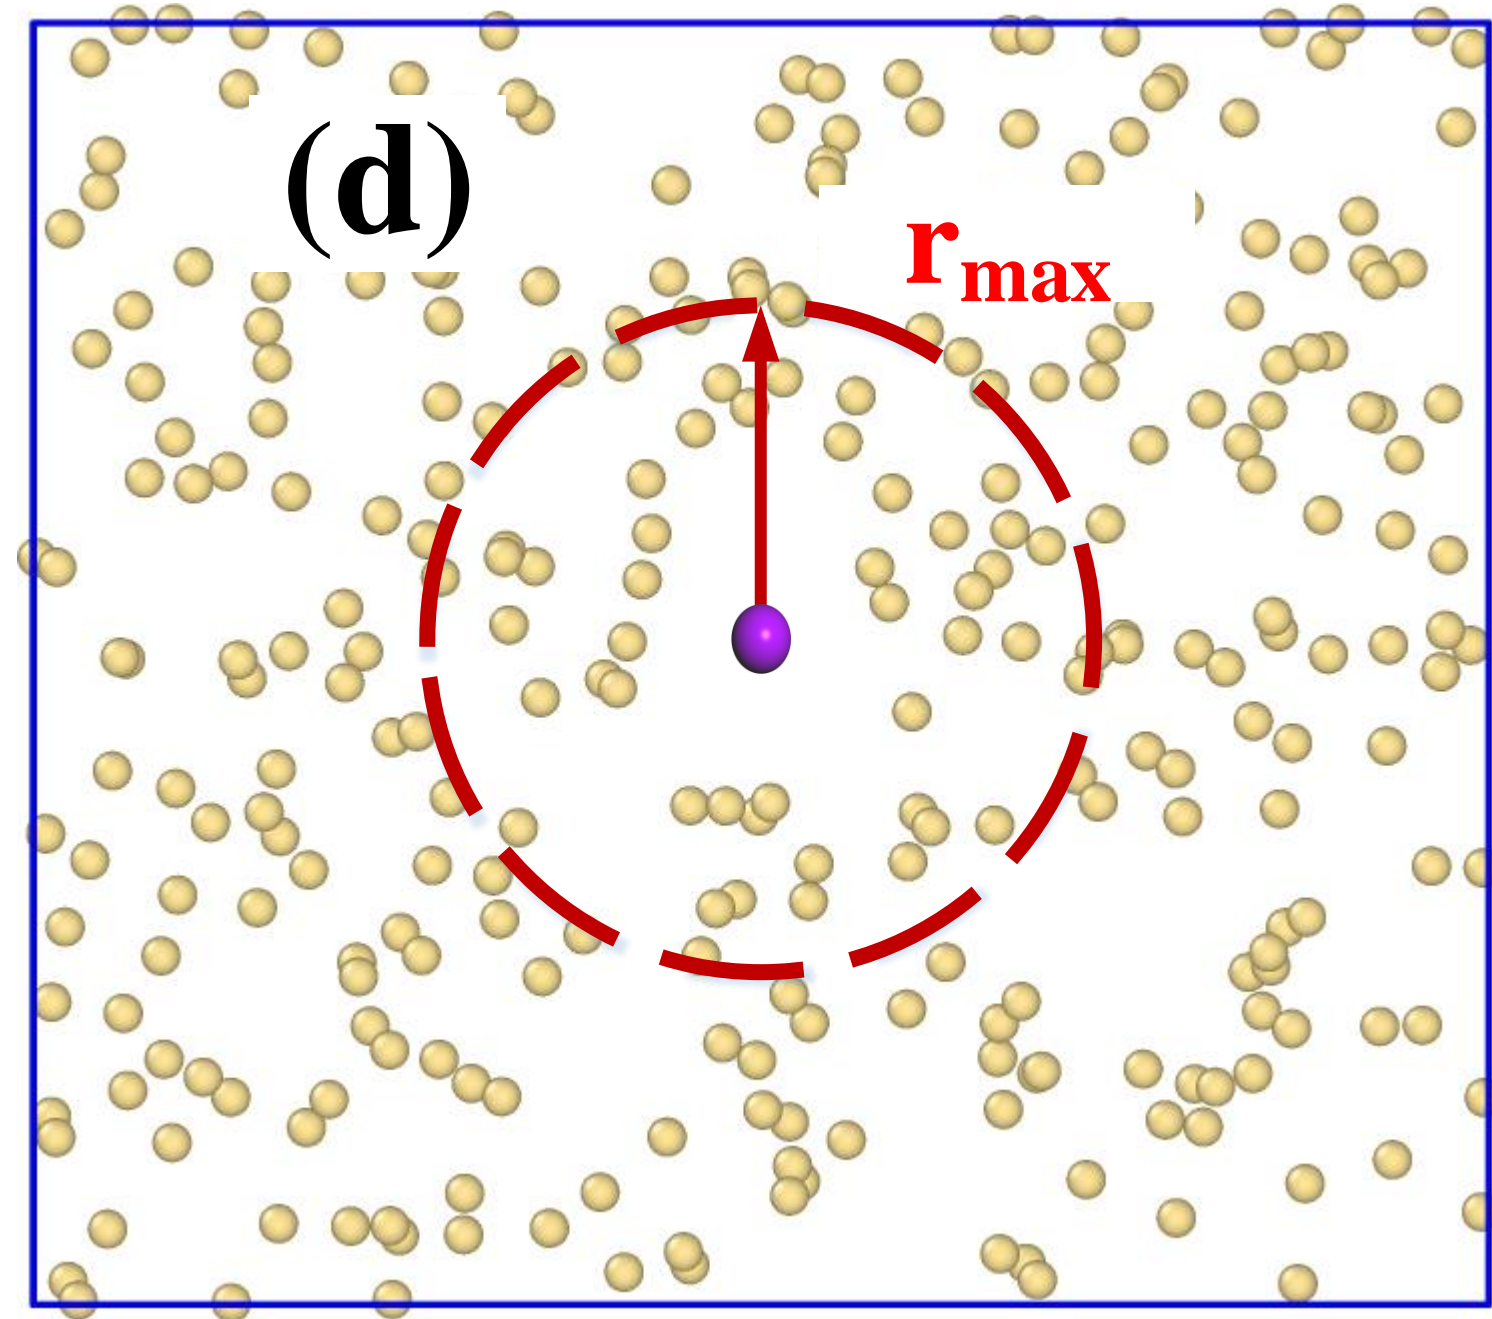

Supplement: s1 [file s1]

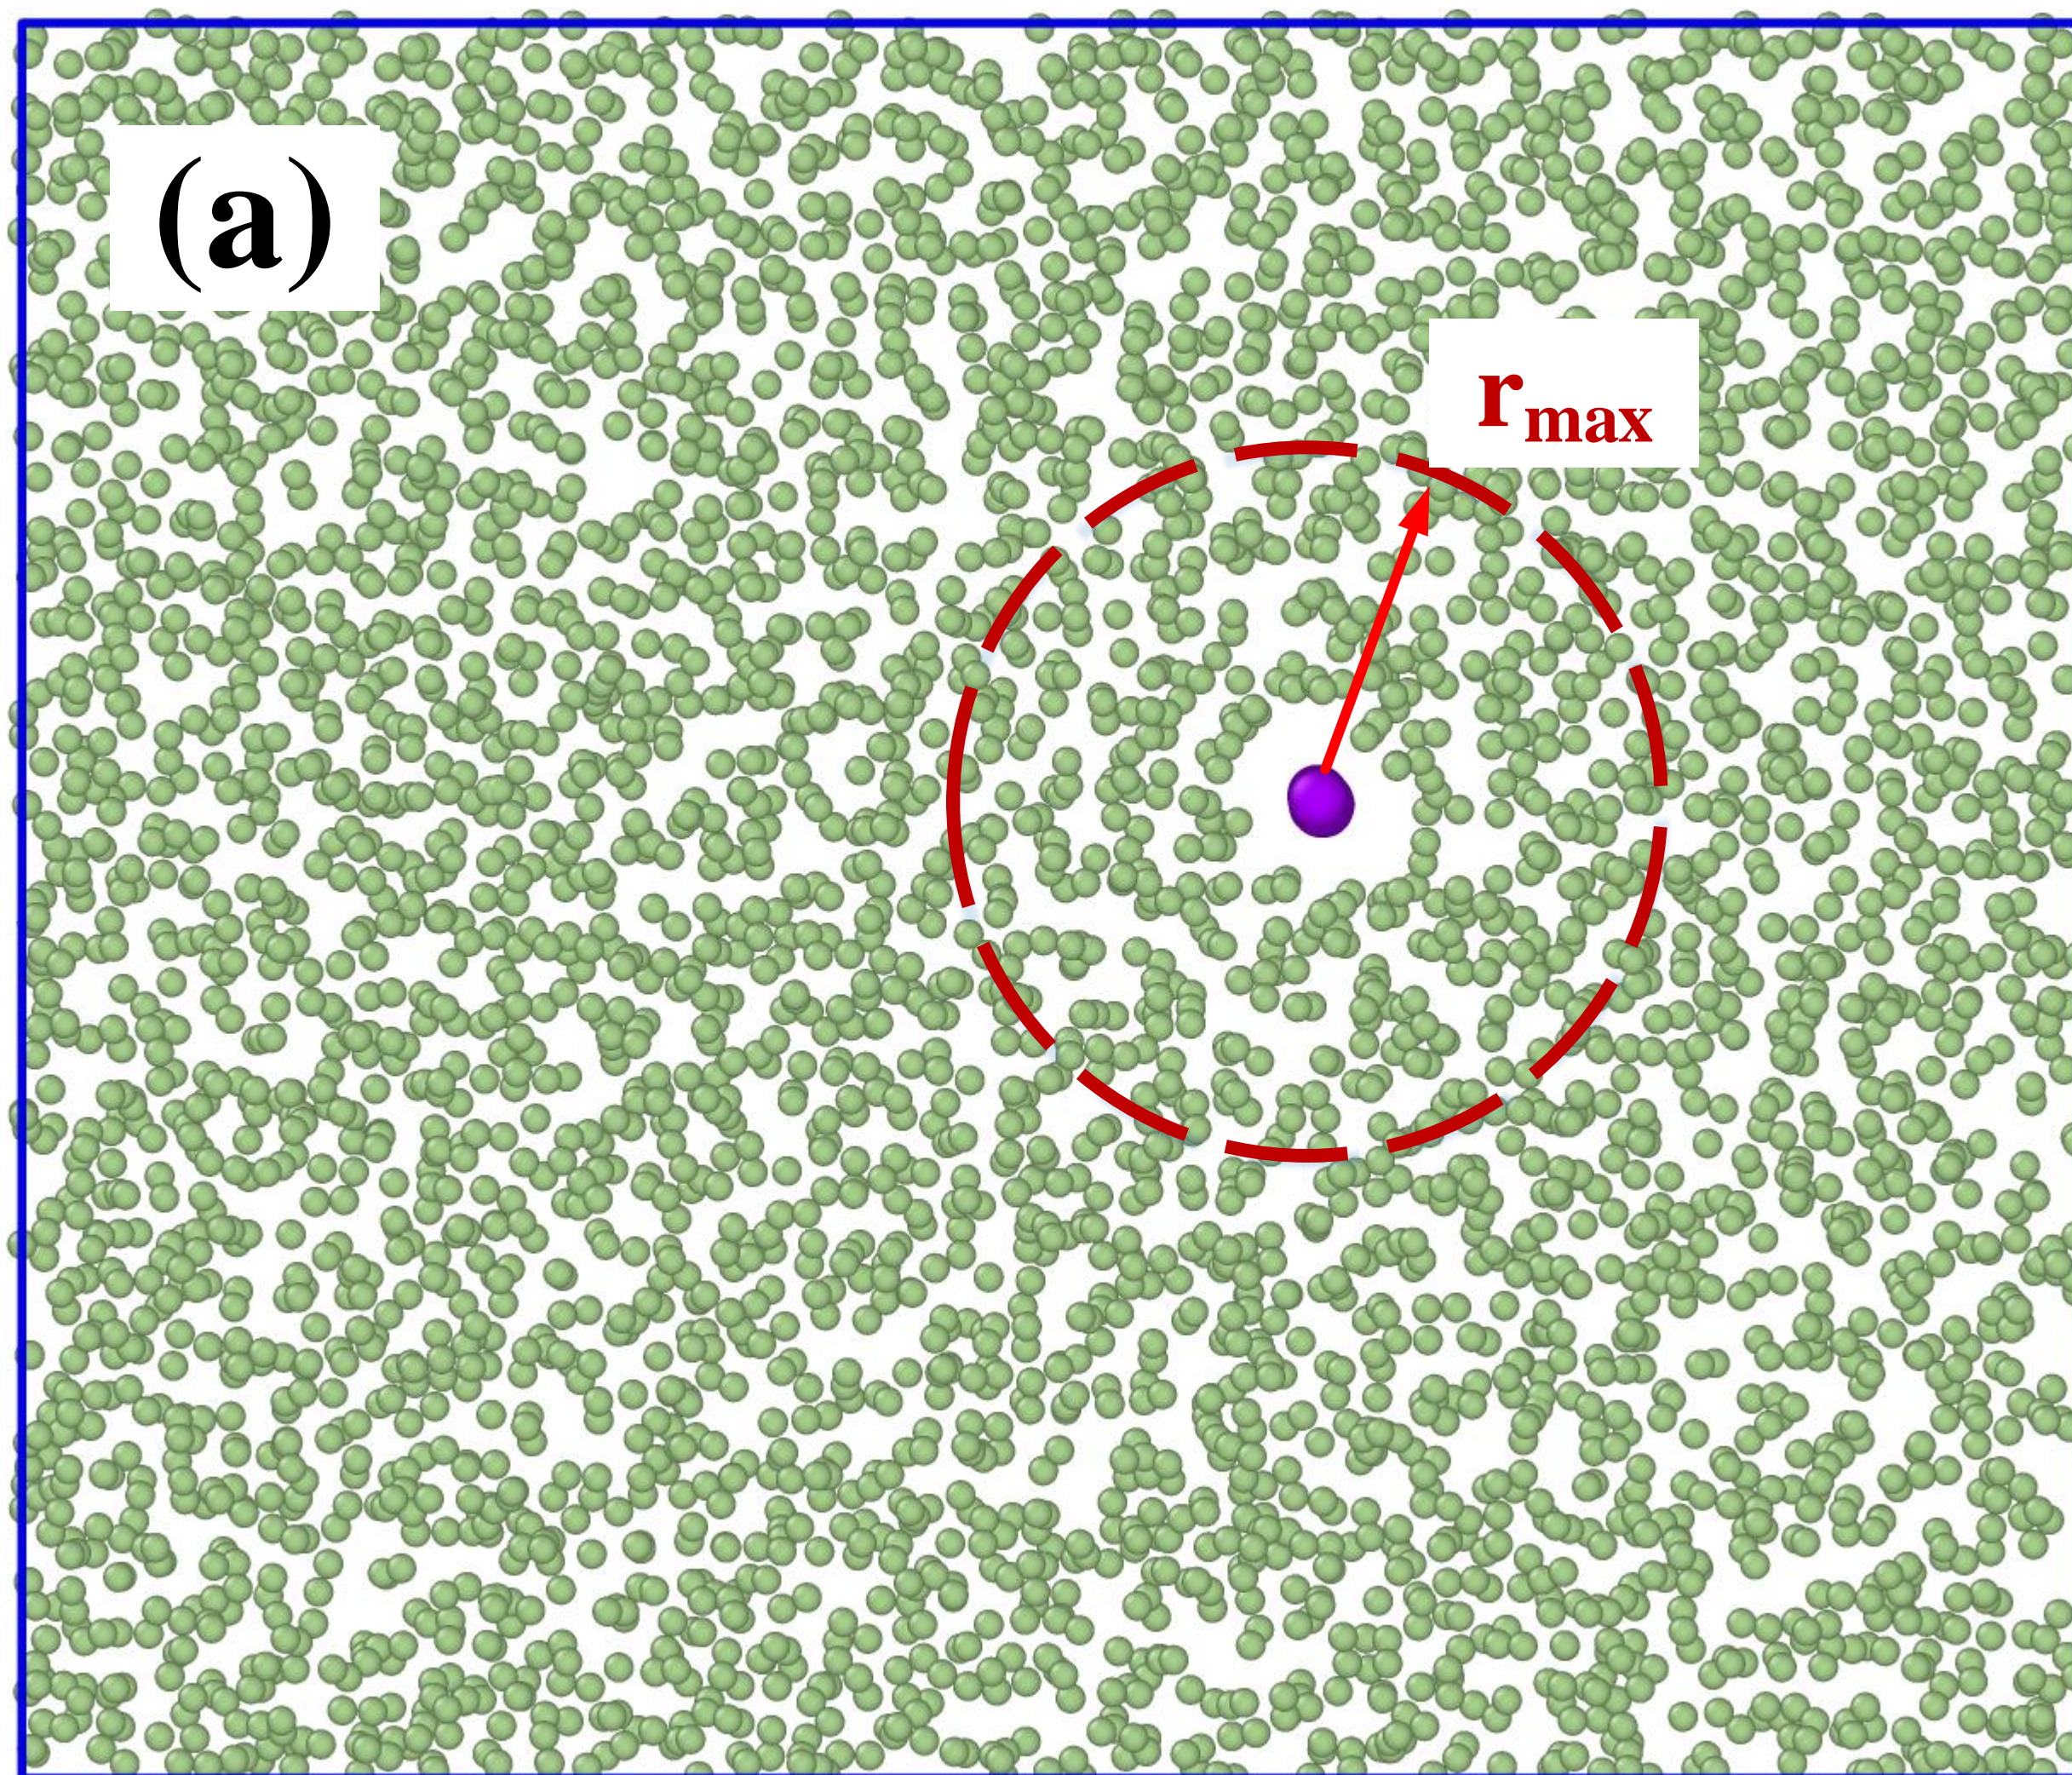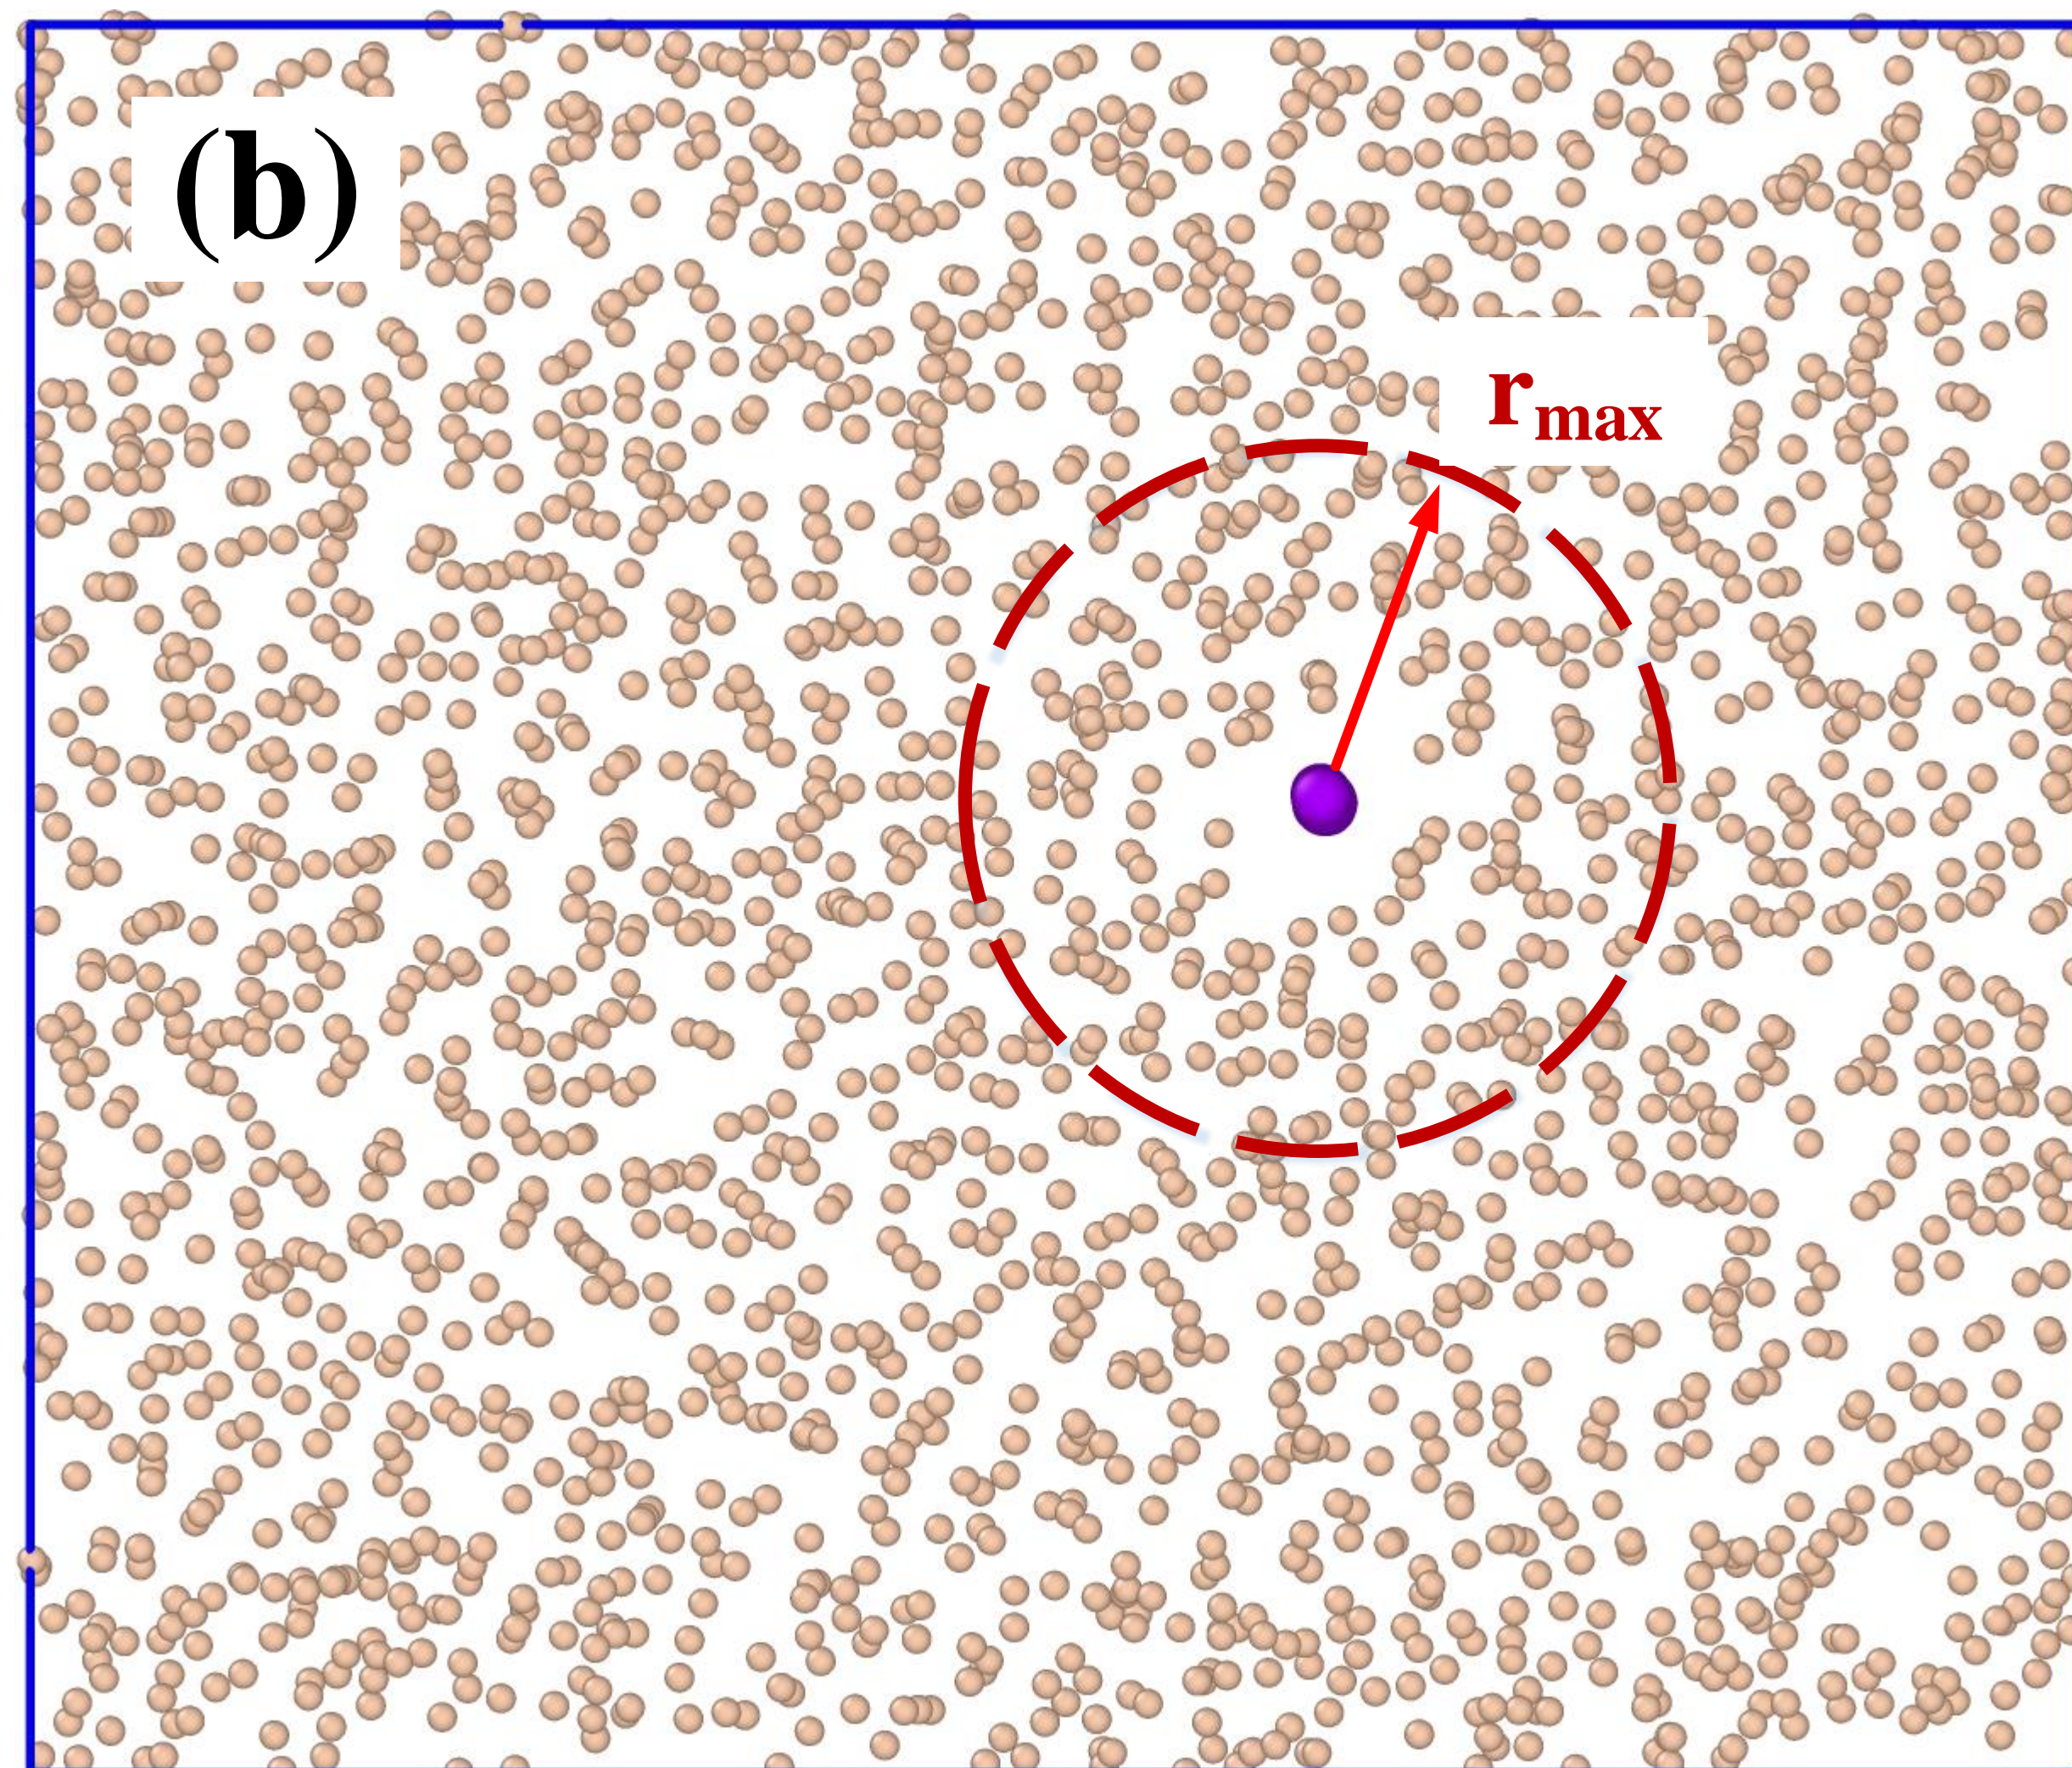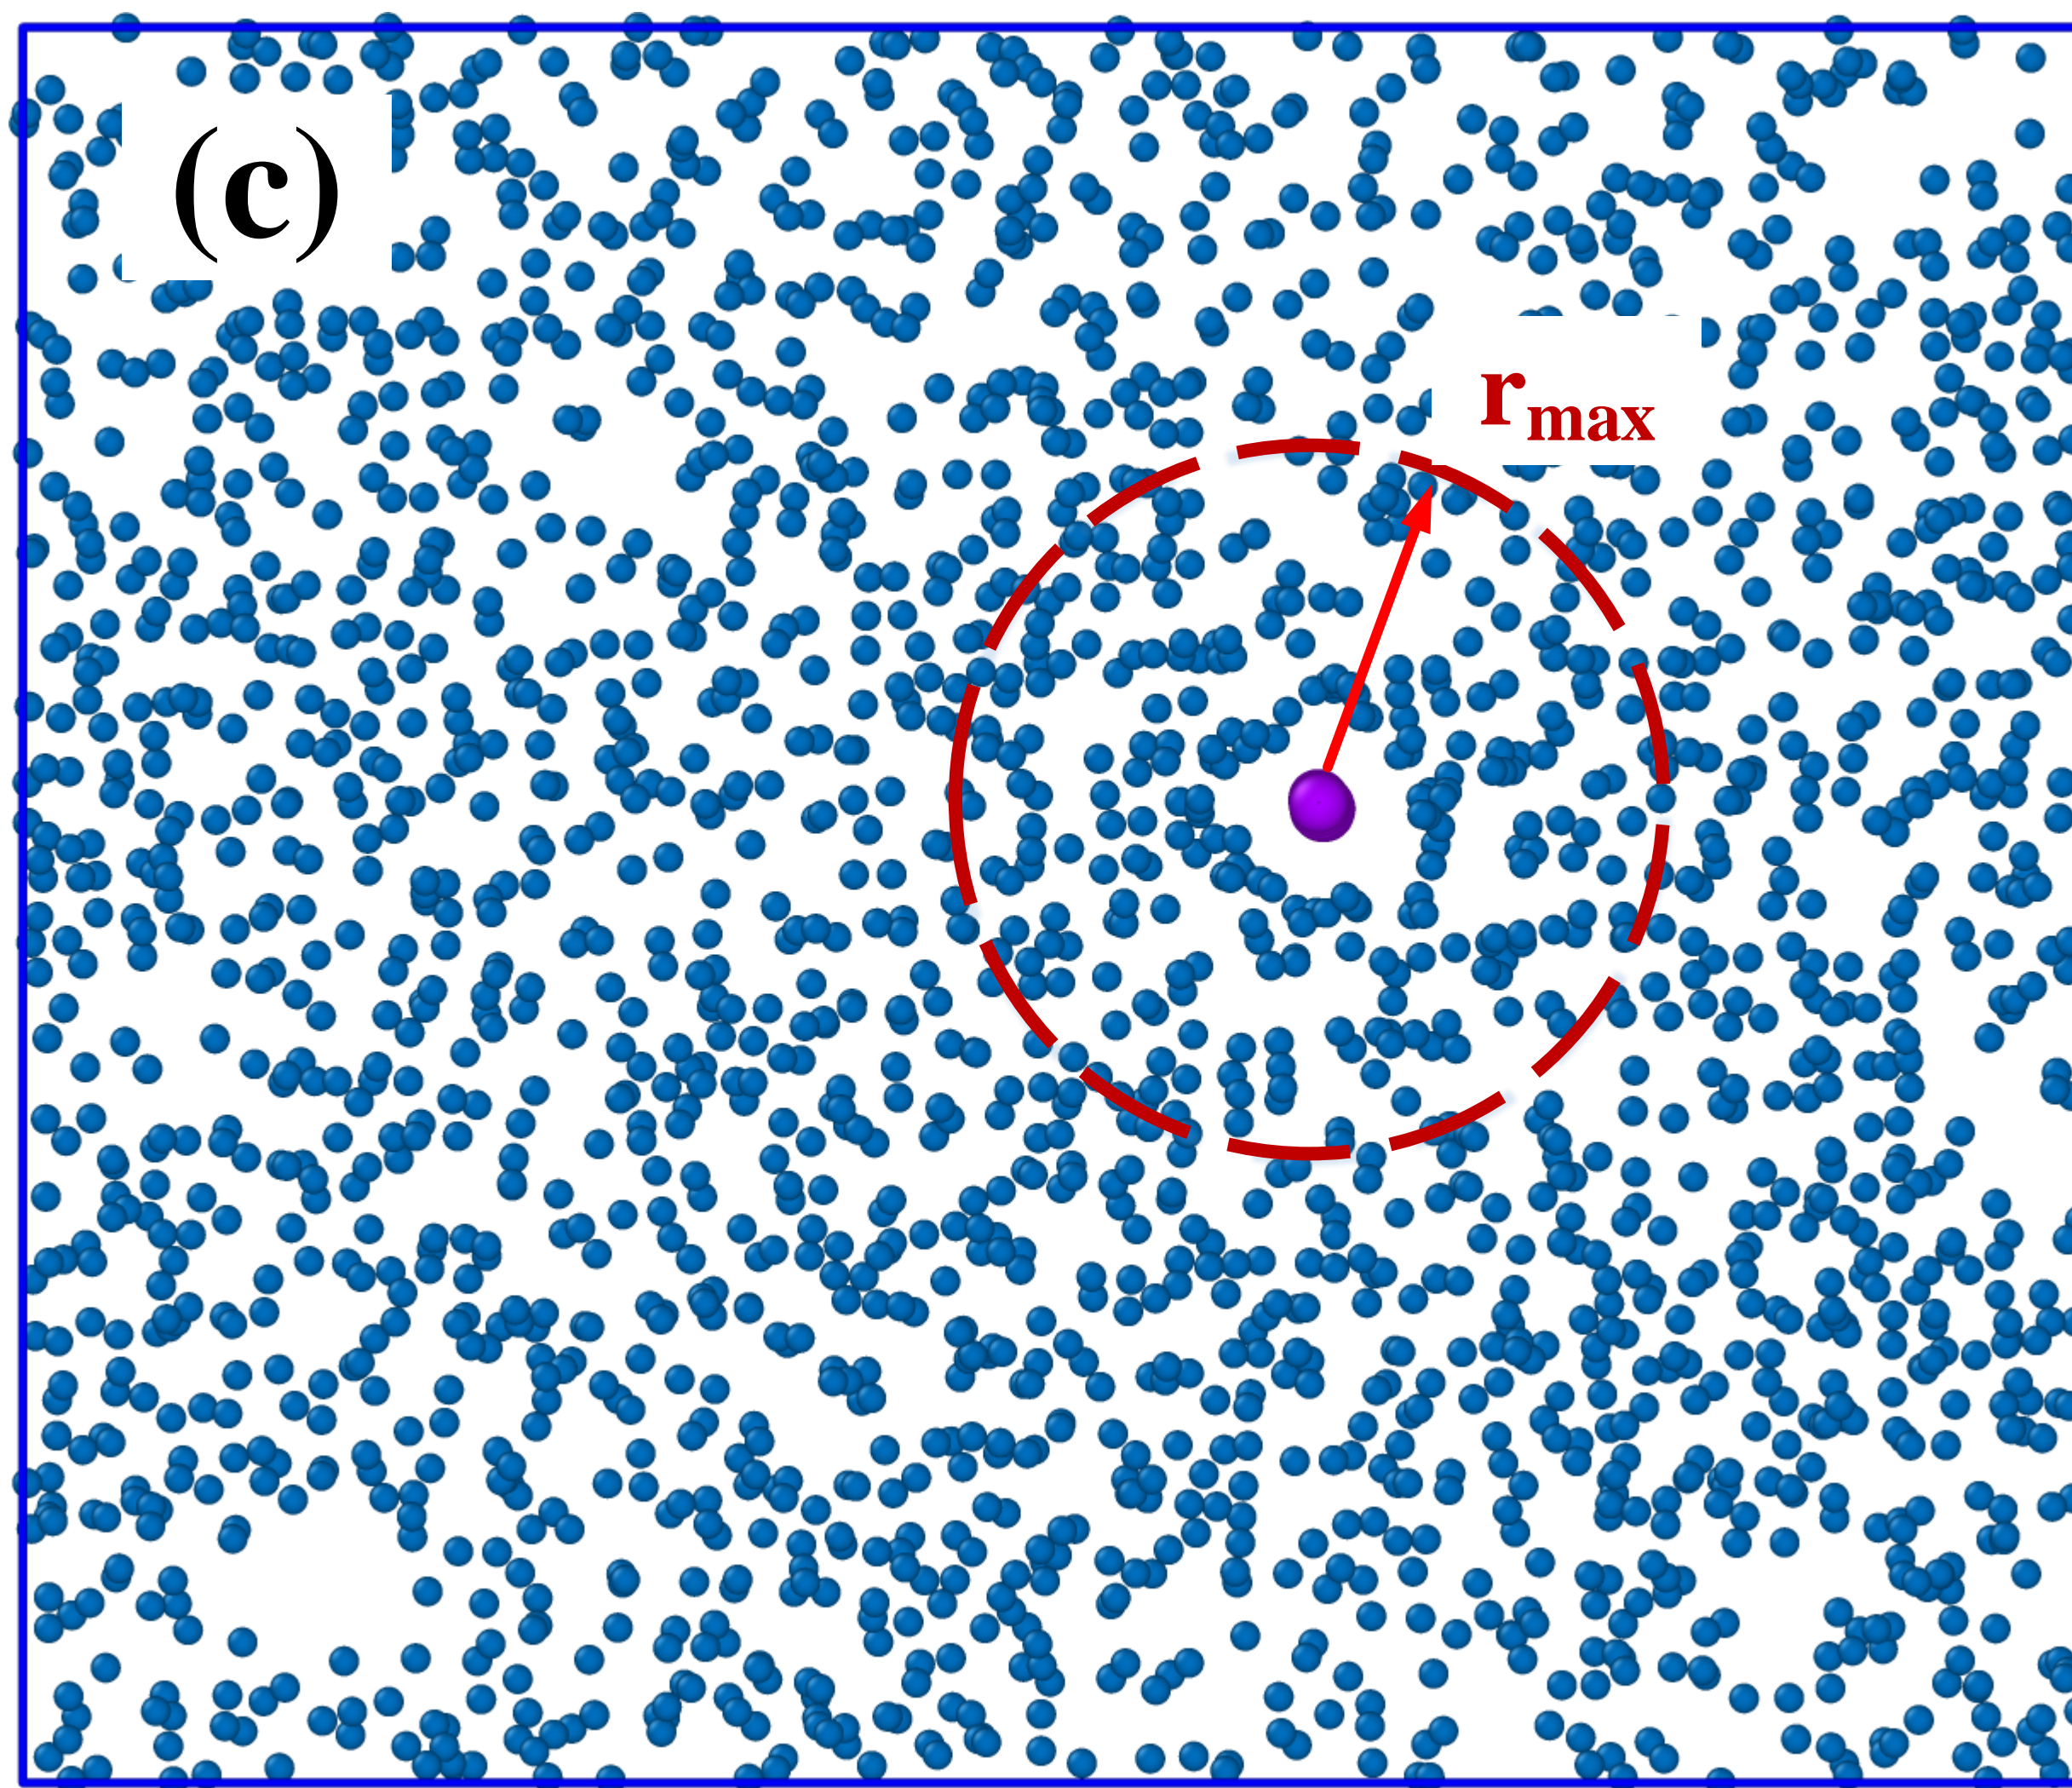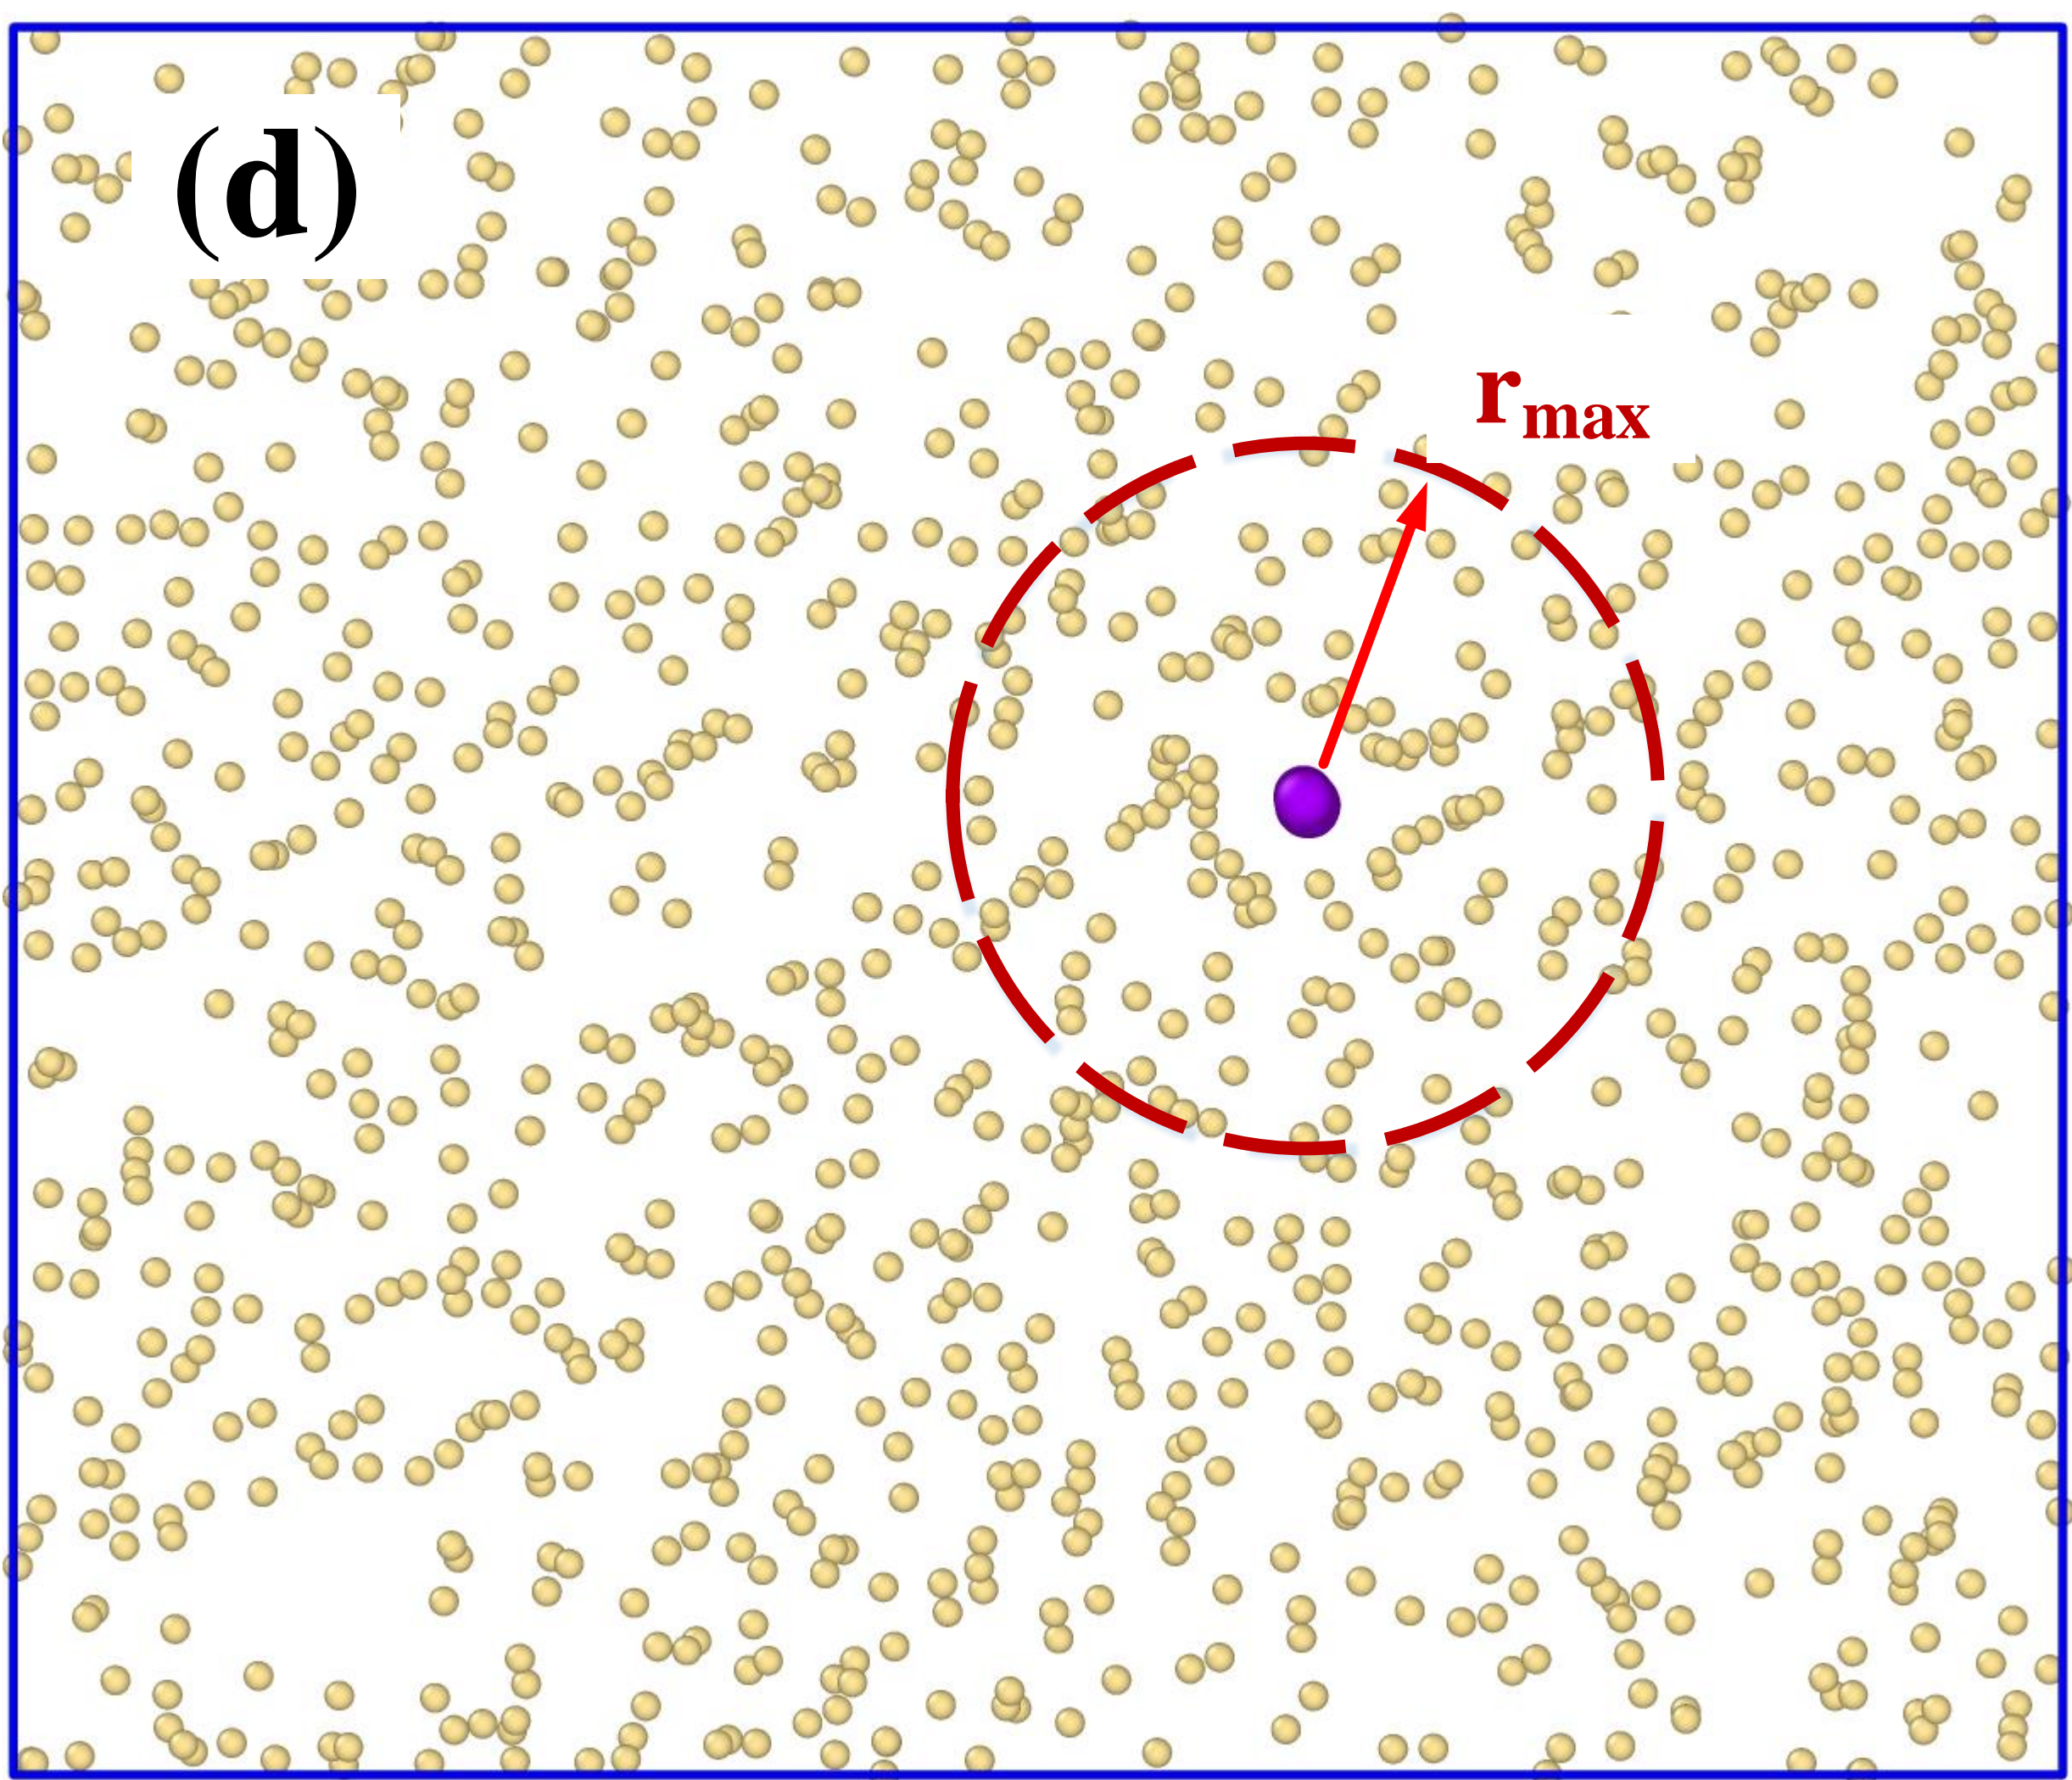

Supplement: s1 [file s1]
